# Supplementary material for: R2TP/Prefoldin-like component RUVBL1/RUVBL2 directly interacts with ZNHIT2 to regulate assembly of U5 small nuclear ribonucleoprotein
Source: PubMed Central journal article supplement (PMC5460035; doi:10.1038/ncomms15615), 2017-05-31
Supplement: ncomms15615-s1.pdf [file ncomms15615-s1.pdf]

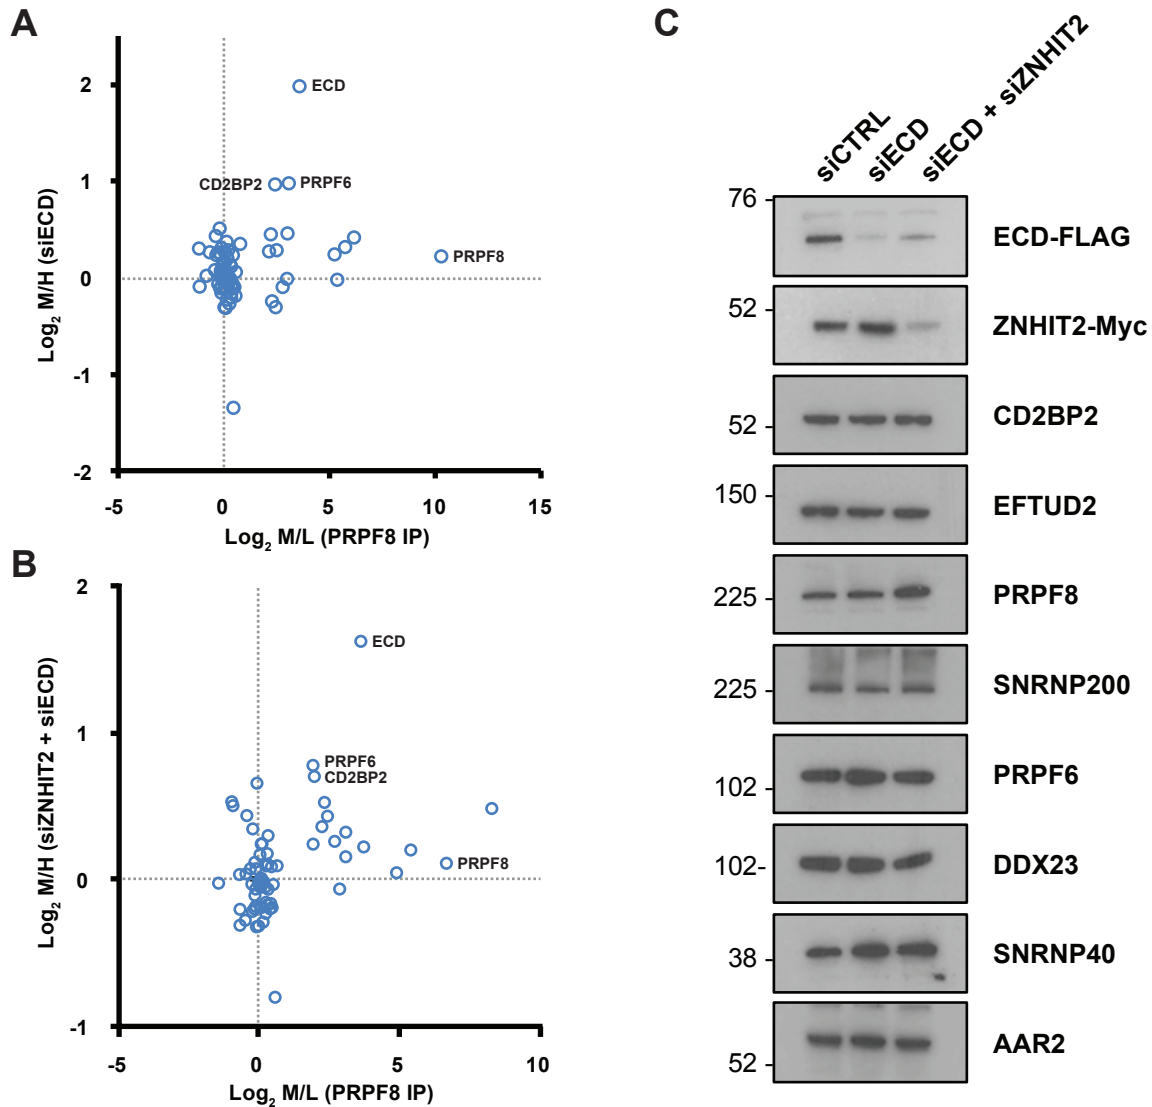

### Supplementary Figure 1. ECD also regulates the composition of the U5 snRNP

(A-B) Interpretation of the SILAC data on scatterplots. Intensity ratio of medium-labeled proteins over unlabeled proteins (M/L) on the X axis denotes IP enrichment. Intensity ratio of medium-labeled proteins over heavy-labeled proteins (M/H) on the Y axis represents experimental variations. Marked proteins in the upper right quadrant are proteins enriched in the IP that were less abundant following siRNA treatment. Position of the protein used for IP is shown in all experiments. (C) Expression assessment of various U5 snRNP subunits following treatment with either siECD or both siECD and siZNHIT2

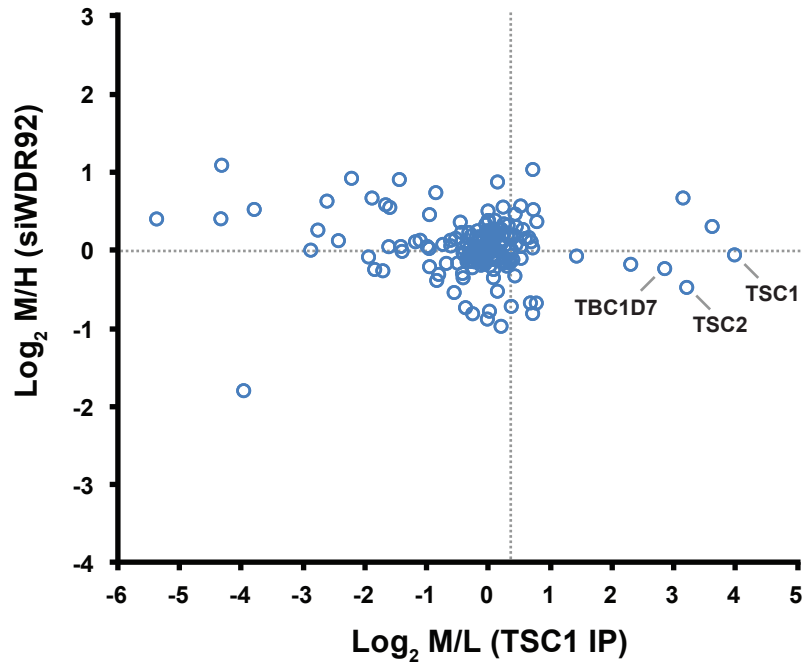

**Supplementary Figure 2. Knockdown of R2TP subunit WDR92 does not appear to regulate the composition of the TSC1-TSC1 complex**

Intensity ratio of medium-labeled proteins over unlabeled proteins (M/L) on the X axis denotes IP enrichment (mediated by TSC1-FLAG). Intensity ratio of medium-labeled proteins over heavy-labeled proteins (M/H) on the Y axis represents experimental variations. Marked proteins show the three subunits of the TSC1-TSC2 complex that were enriched in the IP but whose abundance was not significantly affected by siRNA treatment.

**Figure 2B**

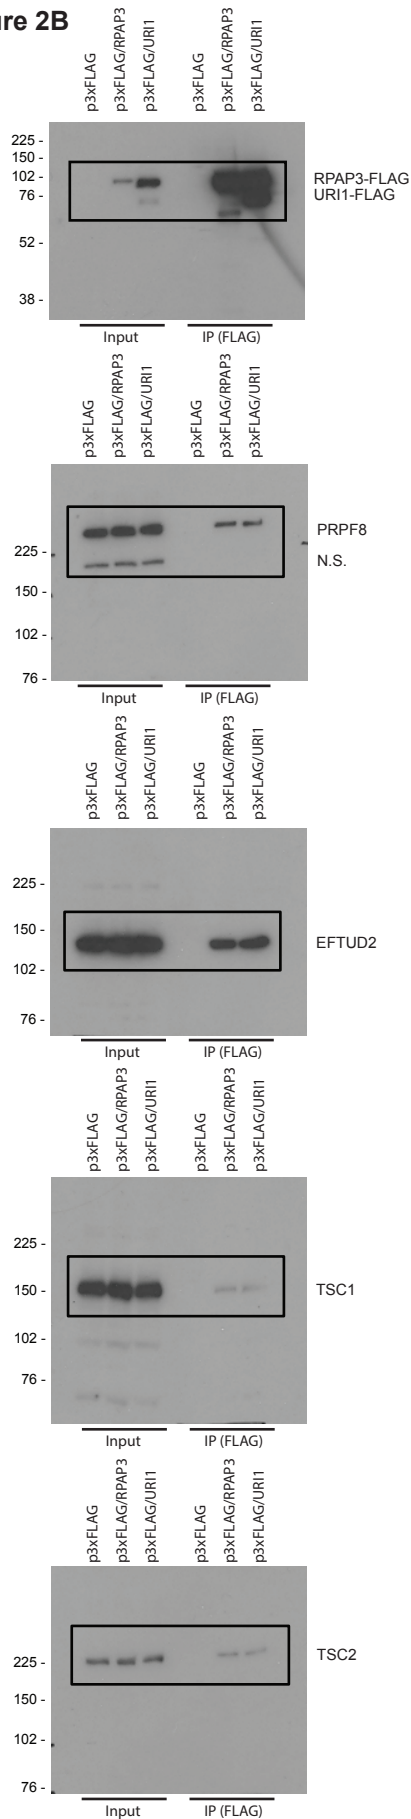

**Figure 4B**

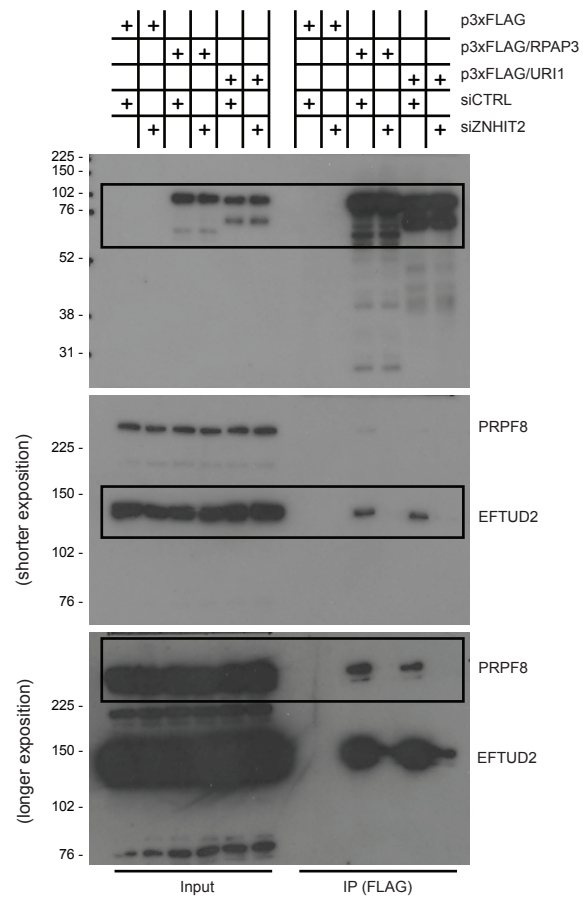

**Figure 5C**

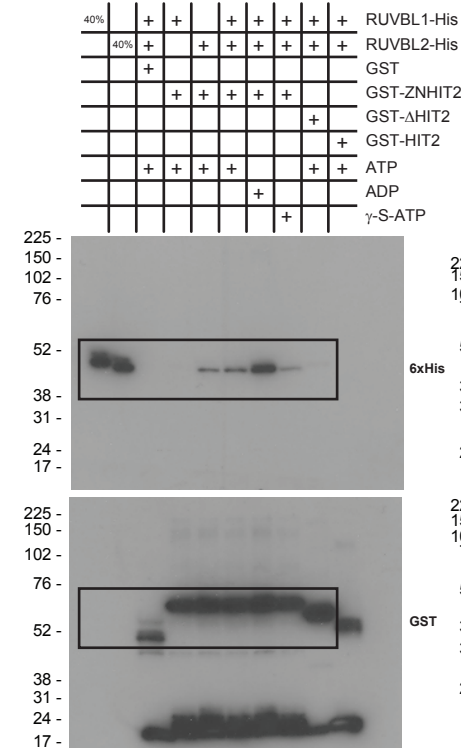

**Figure 5D**

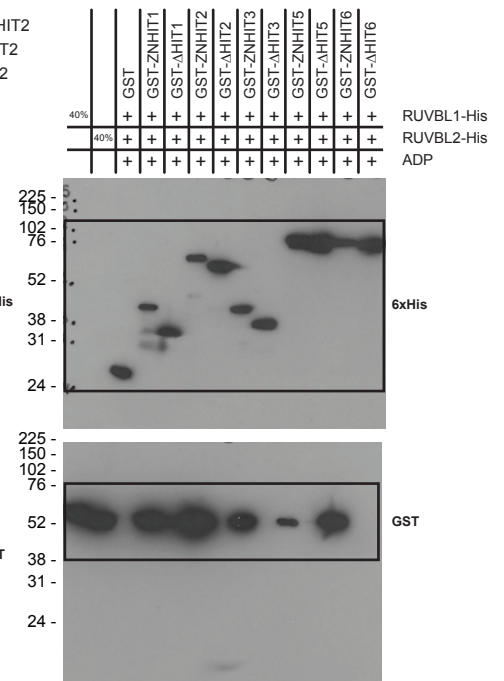

**Supplementary Figure 3. Uncropped scans of immuno-blot shown in the figures**  
Boxes indicate the cropped areas used in the figure.

**Figure 7B**

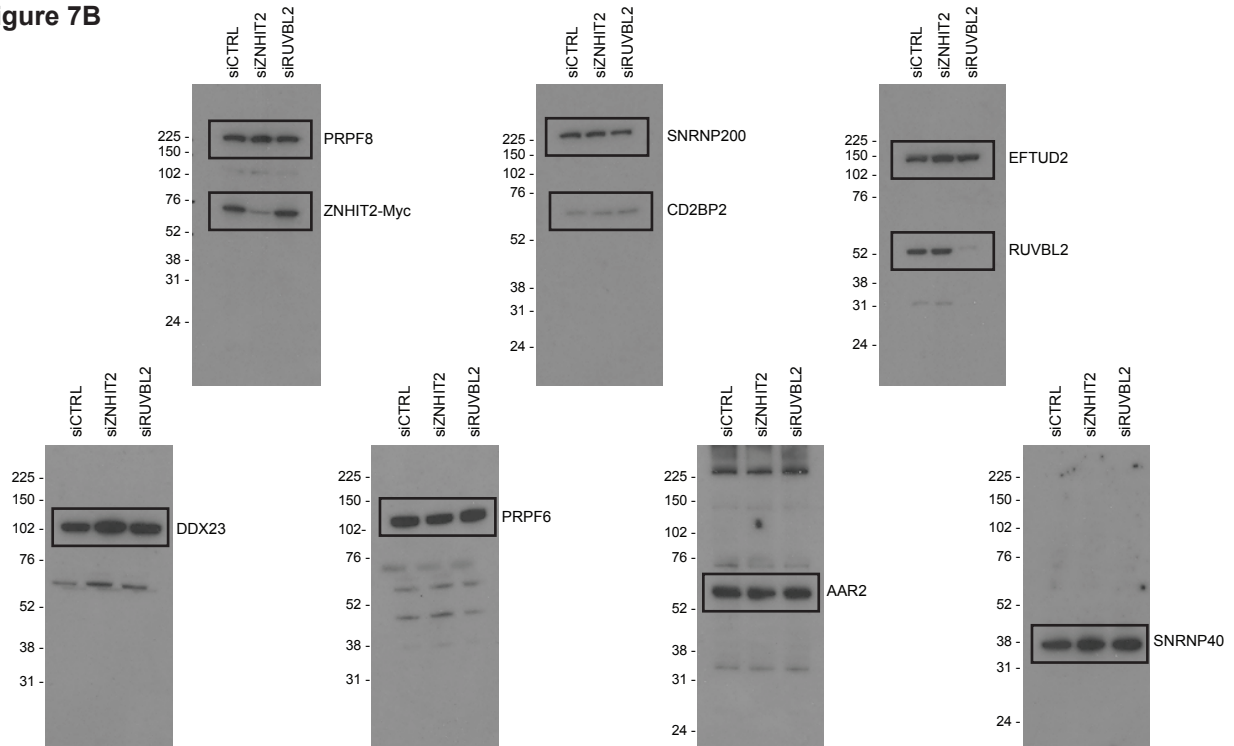

**Supplementary Figure 1C**

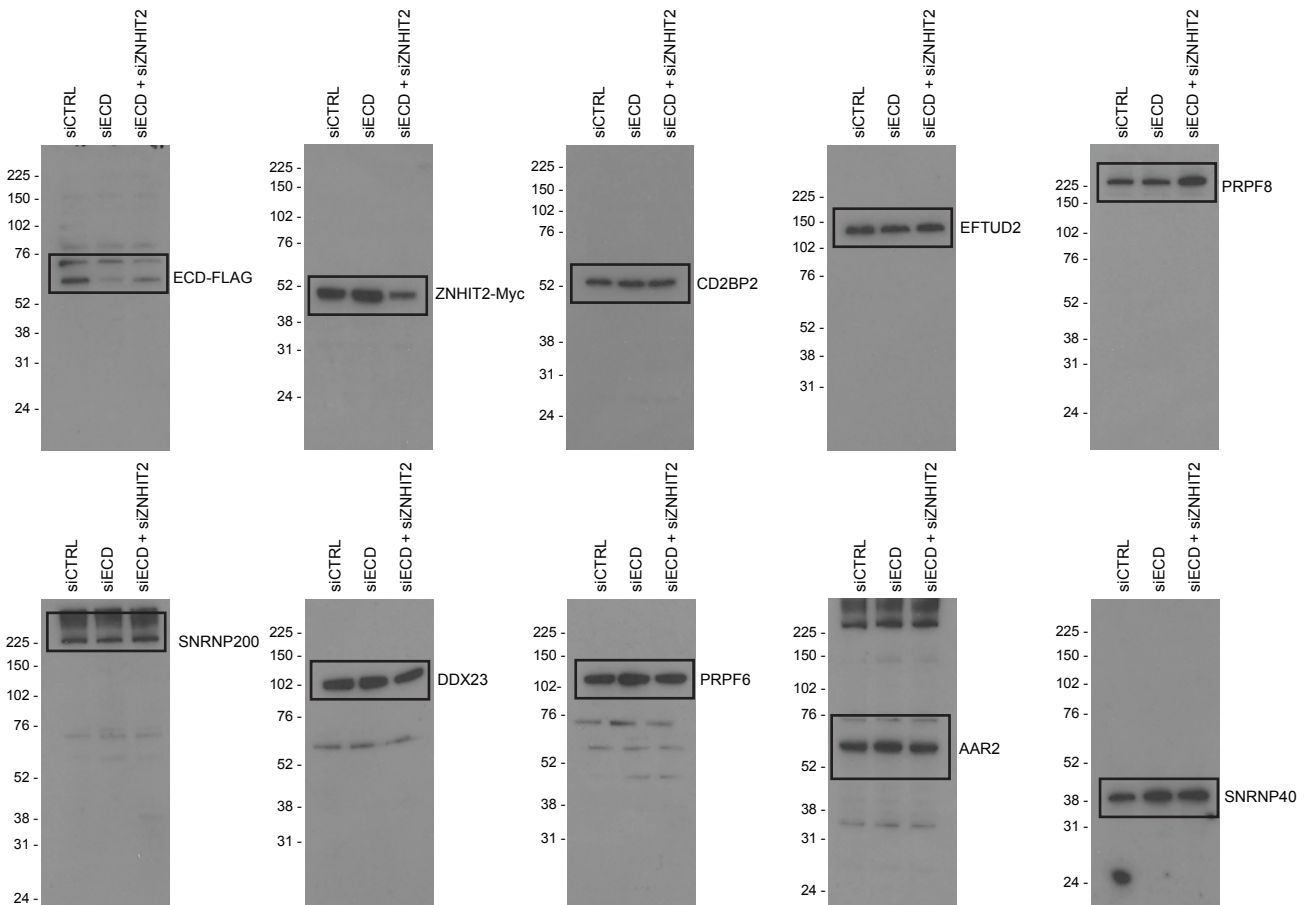

**Supplementary Figure 4. Uncropped scans of immuno-blots shown in the figures**  
Boxes indicate the cropped areas used in the figure.

| Vector                        | cDNA     | Source          | 5' end  | 3' end |
|-------------------------------|----------|-----------------|---------|--------|
| pMZI                          | AAR2     | IMAGE 3536406   | XhoI    | NotI   |
| pMZI                          | CD2BP2   | IMAGE 2820690   | XhoI    | NdeI   |
| pMZI                          | EAPP     | IMAGE 3460193   | XhoI    | NdeI   |
| pMZI                          | ECD      | IMAGE 3504956   | XbaI    | NotI   |
| pMZI                          | FBXO3    | IMAGE 5549548   | XbaI    | NotI   |
| pMZI                          | NCDN     | IMAGE 3914058   | XhoI    | NdeI   |
| pMZI                          | POLDIP2  | IMAGE 3943941   | XhoI    | NdeI   |
| pMZI                          | RPAP3    | IMAGE 5218249   | NotI    | NdeI   |
| pMZI                          | RUVBL1   | IMAGE 591284    | NotI    | NdeI   |
| pMZI                          | RUVBL2   | IMAGE 3051517   | NotI    | NdeI   |
| pMZI                          | SLC7A6OS | IMAGE 4345035   | XbaI    | NdeI   |
| pMZI                          | TBC1D7   | IMAGE 3828592   | XhoI    | NdeI   |
| modified pMZI                 | TSC1     | pRK7-FLAG-TSC1  | EcoRV   | NotI   |
| pMZI                          | TSC2     | pRK7-FLAG-TSC2  | XhoI    | NdeI   |
| pMZI                          | TSSC4    | IMAGE 3677524   | XhoI    | NdeI   |
| pMZI                          | URI1     | IMAGE 6500727   | XhoI    | NdeI   |
| pMZI                          | WDR92    | IMAGE 6164689   | XhoI    | NotI   |
| pMZI                          | ZNHIT1   | LIFESEQ 1268277 | XhoI    | NdeI   |
| pMZI                          | ZNHIT2   | IMAGE 6107352   | XhoI    | NdeI   |
| pMZI                          | ZNHIT3   | LIFESEQ 7179220 | XhoI    | NdeI   |
| pMZI                          | INO80B   | IMAGE 5760624   | XhoI    | NdeI   |
| pMZI                          | DDX59    | IMAGE 5302098   | XhoI    | NdeI   |
| pMZI                          | ZNHIT6   | IMAGE 6012059   | XhoI    | NdeI   |
| pDEST-pcDNA5-BirA-FLAG C-term | ZNHIT2   | IMAGE 6107352   | Gateway |        |
| p3xFLAG-CMV-14                | ECD      | IMAGE 3504956   | NotI    | XbaI   |
| p3xFLAG-CMV-14                | EFTUD2   | IMAGE 2960986   | NotI    | XbaI   |
| p3xFLAG-CMV-14                | PRPF8    | IMAGE 5587081   | NotI    | XbaI   |
| p3xFLAG-CMV-14                | RPAP3    | IMAGE 5218249   | NotI    | XbaI   |
| p3xFLAG-CMV-14                | URI1     | IMAGE 6500727   | NotI    | XbaI   |
| pcDNA3-Myc                    | ZNHIT2   | IMAGE 6107352   | EcoRI   | XhoI   |
| pcDNA3-Myc                    | ΔHIT2    | IMAGE 6107352   | EcoRI   | XhoI   |
| pET-23a+                      | RUVBL1   | IMAGE 591284    | BamHI   | XhoI   |
| pET-23a+                      | RUVBL2   | IMAGE 3051517   | BamHI   | XhoI   |
| pGEX-4T-1                     | ZNHIT1   | LIFESEQ 1268277 | Sall    | NotI   |
| pGEX-4T-1                     | ΔHIT1    | LIFESEQ 1268277 | Sall    | NotI   |
| pGEX-4T-1                     | ZNHIT2   | IMAGE 6107352   | BamHI   | XhoI   |
| pGEX-4T-1                     | ΔHIT2    | IMAGE 6107352   | BamHI   | XhoI   |
| pGEX-4T-1                     | ZNHIT3   | LIFESEQ 7179220 | Sall    | NotI   |
| pGEX-4T-1                     | ΔHIT3    | LIFESEQ 7179220 | Sall    | NotI   |
| pGEX-4T-1                     | INO80B   | IMAGE 5760624   | Sall    | NotI   |
| pGEX-4T-1                     | ΔHIT4    | IMAGE 5760624   | Sall    | NotI   |
| pGEX-4T-1                     | DDX59    | IMAGE 5302098   | Sall    | NotI   |
| pGEX-4T-1                     | ΔHIT5    | IMAGE 5302098   | Sall    | NotI   |
| pGEX-4T-1                     | ZNHIT6   | IMAGE 6012059   | Sall    | NotI   |
| pGEX-4T-1                     | ΔHIT6    | IMAGE 6012059   | Sall    | NotI   |

Supplementary Table 1. List of expression vectors created for this manuscript and cloning strategy
